# Supplementary material
Source: PubMed Central journal article supplement (PMC6705129)
Supplement: NIHMS1046983-supplement-2.pdf [file NIHMS1046983-supplement-2.pdf]

29. B. K. Kobilka, Amino and carboxyl terminal modifications to facilitate the production and purification of a G protein-coupled receptor. *Anal Biochem* **231**, 269-271 (1995).
30. D. P. Staus *et al.*, Regulation of beta2-adrenergic receptor function by conformationally selective single-domain intrabodies. *Mol Pharmacol* **85**, 472-481 (2014).
31. D. P. Staus *et al.*, Sortase ligation enables homogeneous GPCR phosphorylation to reveal diversity in beta-arrestin coupling. *Proc Natl Acad Sci U S A* **115**, 3834-3839 (2018).
32. A. K. Shukla *et al.*, Structure of active beta-arrestin-1 bound to a G-protein-coupled receptor phosphopeptide. *Nature* **497**, 137-141 (2013).
33. L. Toll *et al.*, Thermodynamics and docking of agonists to the beta(2)-adrenoceptor determined using [(3)H](R,R')-4-methoxyfenoterol as the marker ligand. *Mol Pharmacol* **81**, 846-854 (2012).
34. R. T. Strachan *et al.*, Divergent transducer-specific molecular efficacies generate biased agonism at a G protein-coupled receptor (GPCR). *J Biol Chem* **289**, 14211-14224 (2014).
35. M. Caffrey, V. Cherezov, Crystallizing membrane proteins using lipidic mesophases. *Nat Protoc* **4**, 706-731 (2009).
36. K. Hirata *et al.*, ZOO: an automatic data-collection system for high-throughput structure analysis in protein microcrystallography. *Acta Crystallogr D Struct Biol* **75**, 138-150 (2019).
37. K. Yamashita, K. Hirata, M. Yamamoto, KAMO: towards automated data processing for microcrystals. *Acta Crystallogr D Struct Biol* **74**, 441-449 (2018).
38. W. Kabsch, Xds. *Acta Crystallogr D Biol Crystallogr* **66**, 125-132 (2010).
39. P. D. Adams *et al.*, PHENIX: a comprehensive Python-based system for macromolecular structure solution. *Acta Crystallogr D Biol Crystallogr* **66**, 213-221 (2010).
40. P. V. Afonine *et al.*, Towards automated crystallographic structure refinement with phenix.refine. *Acta Crystallogr D Biol Crystallogr* **68**, 352-367 (2012).
41. N. W. Moriarty, R. W. Grosse-Kunstleve, P. D. Adams, electronic Ligand Builder and Optimization Workbench (eLBOW): a tool for ligand coordinate and restraint generation. *Acta Crystallogr D Biol Crystallogr* **65**, 1074-1080 (2009).
42. T. C. Terwilliger, H. Klei, P. D. Adams, N. W. Moriarty, J. D. Cohn, Automated ligand fitting by core-fragment fitting and extension into density. *Acta Crystallogr D Biol Crystallogr* **62**, 915-922 (2006).
43. P. Emsley, B. Lohkamp, W. G. Scott, K. Cowtan, Features and development of Coot. *Acta Crystallogr D Biol Crystallogr* **66**, 486-501 (2010).
44. D. Liebschner *et al.*, Polder maps: improving OMIT maps by excluding bulk solvent. *Acta Crystallogr D Struct Biol* **73**, 148-157 (2017).
45. L. F. Ten Eyck, Fast Fourier transform calculation of electron density maps. *Methods Enzymol* **115**, 324-337 (1985).
46. M. D. Winn *et al.*, Overview of the CCP4 suite and current developments. *Acta Crystallogr D Biol Crystallogr* **67**, 235-242 (2011).
47. V. B. Chen *et al.*, MolProbity: all-atom structure validation for macromolecular crystallography. *Acta Crystallogr D Biol Crystallogr* **66**, 12-21 (2010).
48. M. A. Lomize, I. D. Pogozheva, H. Joo, H. I. Mosberg, A. L. Lomize, OPM database and PPM web server: resources for positioning of proteins in membranes. *Nucleic Acids Res* **40**, D370-376 (2012).
